# Supplementary material for: Unexpected effect of catalyst concentration on photochemical CO2 reduction by trans(Cl)–Ru(bpy)(CO)2Cl2: new mechanistic insight into the CO/HCOO– selectivity
Source: PubMed Central journal article supplement (PMC5490049; doi:10.1039/c5sc00199d), 2015-03-12
Supplement: SC-006-C5SC00199D-s001.pdf [file SC-006-C5SC00199D-s001.pdf]

## Supporting Information

Unexpected effect of catalyst concentration on  
photochemical CO<sub>2</sub> reduction by  
*trans*(Cl)-Ru(bpy)(CO)<sub>2</sub>Cl<sub>2</sub>: new mechanistic insight into  
the CO/HCOO<sup>-</sup> selectivity

Yusuke Kuramochi,<sup>†</sup> Jun Itabashi,<sup>†</sup> Kyohei Fukaya,<sup>†</sup> Akito Enomoto,<sup>†</sup> Makoto Yoshida,<sup>†</sup>  
and Hitoshi Ishida<sup>†, ‡\*</sup>

<sup>†</sup> Department of Chemistry, Graduate School of Science, Kitasato University, 1-15-1 Kitasato,  
Minami-ku, Sagami-hara, Kanagawa 252-0373, Japan

<sup>‡</sup> Precursory Research for Embryonic Science (PRESTO), Japan Science and Technology  
Agency (JST), 4-1-8 Honcho, Kawaguchi, Saitama 332-0012, Japan

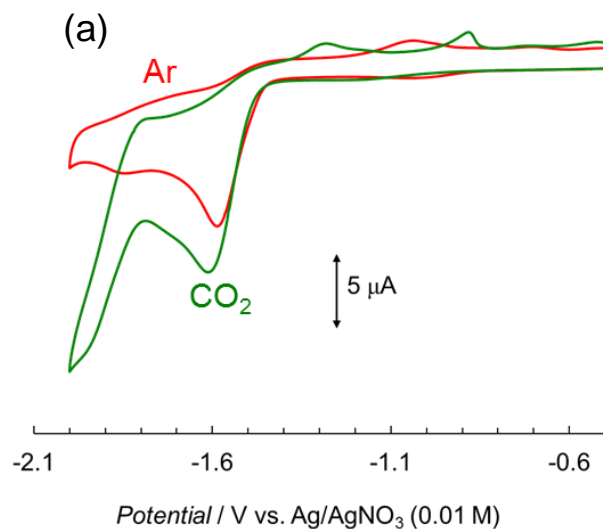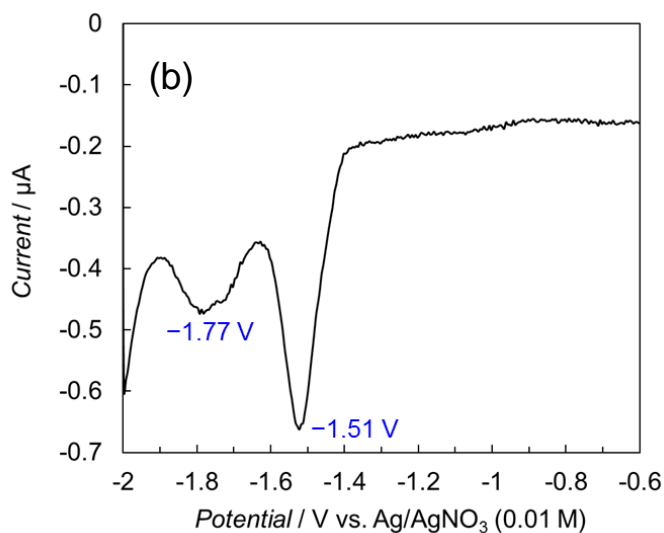

**Figure. S1.** (a) Cyclic voltammograms (CVs) of *trans*(Cl)-Ru(bpy)(CO)<sub>2</sub>Cl<sub>2</sub> (0.50 mM) under Ar (red) and CO<sub>2</sub> (green) in DMA/water (9:1 v/v) using 0.10 M <sup>n</sup>Bu<sub>4</sub>NClO<sub>4</sub> as the supporting electrolyte and Ag/AgNO<sub>3</sub> (1.0×10<sup>-2</sup> M, in CH<sub>3</sub>CN) as the reference electrode. Scan rate: 100 mV/s. (b) Differential pulse voltammogram (DPV) of *trans*(Cl)-Ru(bpy)(CO)<sub>2</sub>Cl<sub>2</sub> (0.50 mM) in the Ar-saturated DMA/water (9:1 v/v) solution.

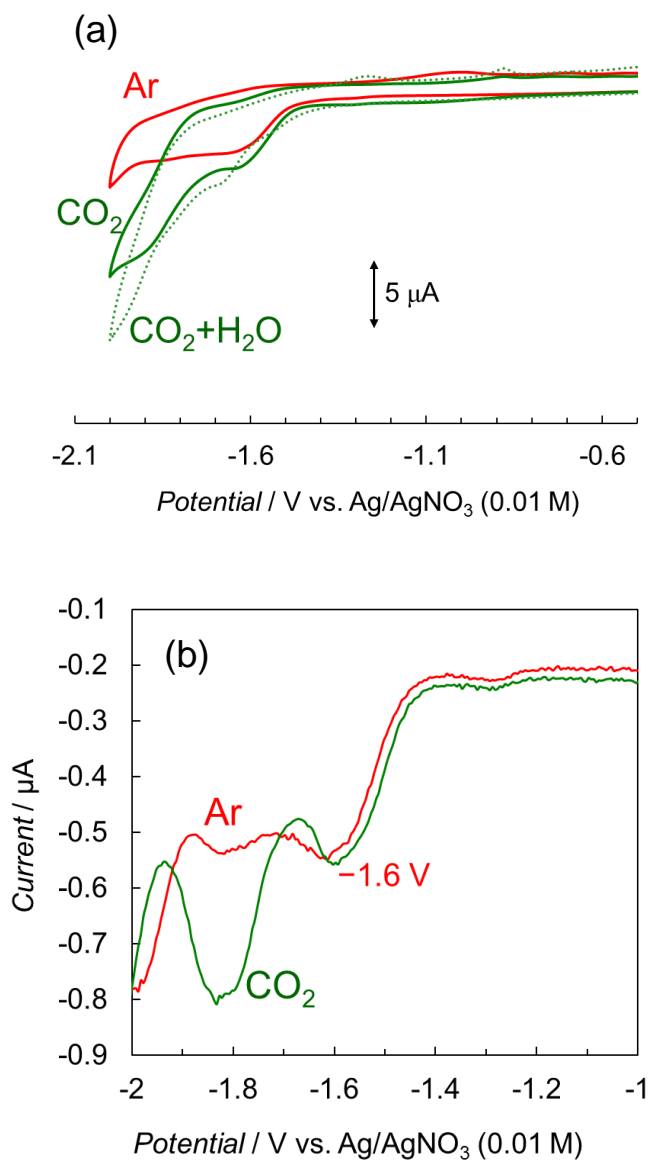

**Figure. S2.** (a) Cyclic voltammograms (CVs) of [Ru(bpy)(CO)<sub>2</sub>Cl]<sub>2</sub> (0.30 mM) under Ar (red), CO<sub>2</sub> (green solid) and CO<sub>2</sub> + 10w% H<sub>2</sub>O (green dotted) in DMA using 0.10 M <sup>n</sup>Bu<sub>4</sub>NClO<sub>4</sub> as the supporting electrolyte and Ag/AgNO<sub>3</sub> (1.0×10<sup>-2</sup> M, in CH<sub>3</sub>CN) as the reference electrode. Scan rate: 100 mV/s. (b) Differential pulse voltammograms (DPV) of [Ru(bpy)(CO)<sub>2</sub>Cl]<sub>2</sub> (0.30 mM) under Ar (red) and CO<sub>2</sub> (green) in DMA.

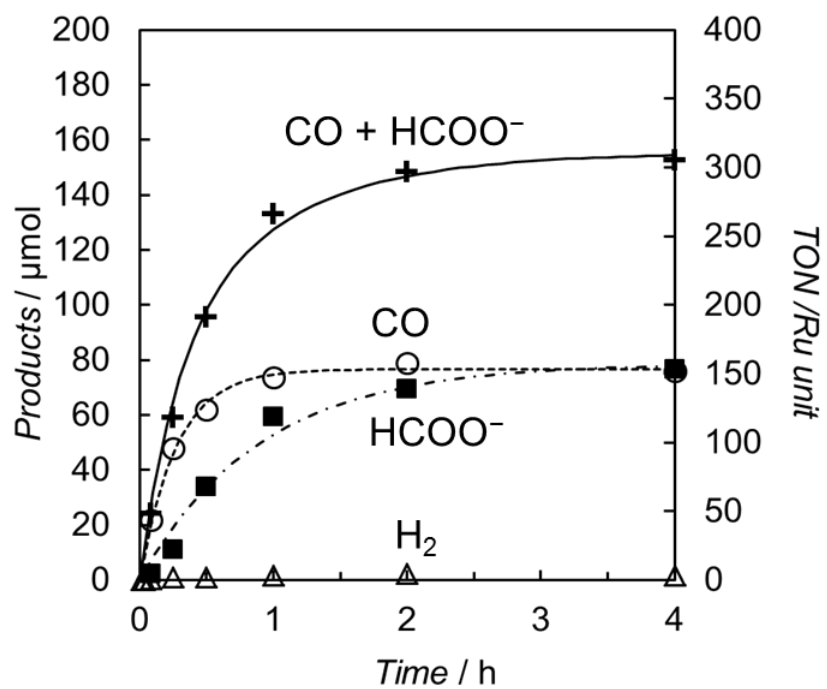

**Figure S3.** Photo-irradiation time dependence of the products in the CO<sub>2</sub>-saturated DMA/water (9:1 v/v) solution containing [Ru(bpy)(CO)<sub>2</sub>Cl]<sub>2</sub> (0.050 mM), [Ru(bpy)<sub>3</sub>](PF<sub>6</sub>)<sub>2</sub> (0.50 mM) and BNAH (0.10 M): CO (○), HCOO<sup>-</sup> (■), H<sub>2</sub> (Δ) and CO + HCOO<sup>-</sup> (+).

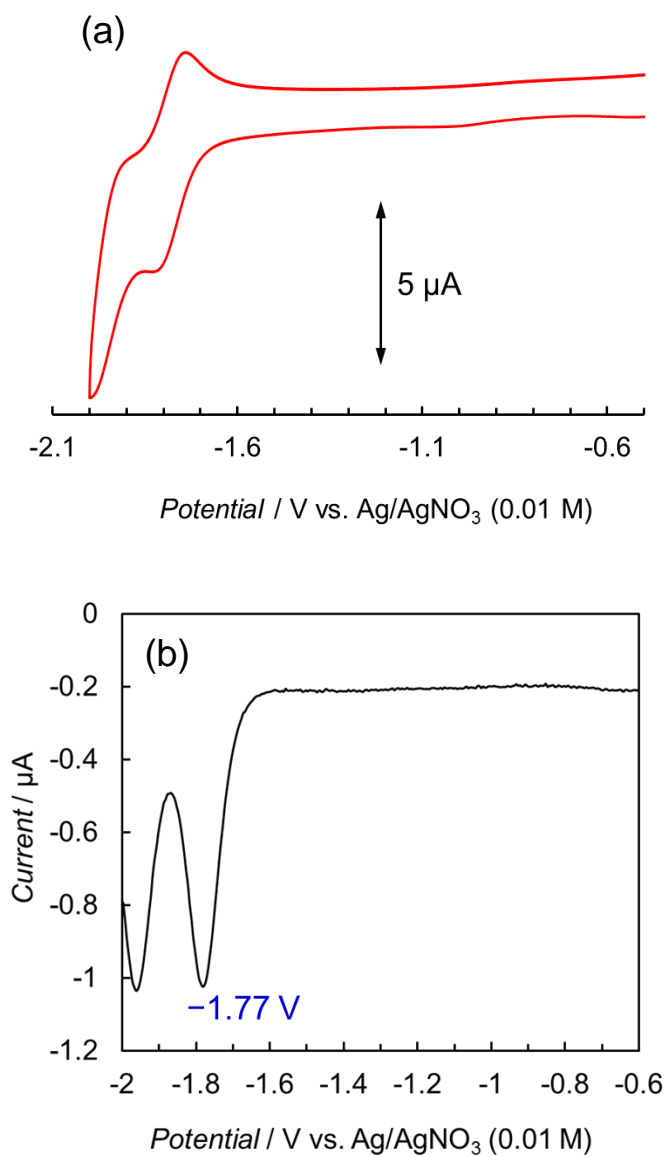

**Figure. S4.** (a) Cyclic voltammogram (CV) of  $[\text{Ru}(\text{4dmbpy})_3](\text{PF}_6)_2$  (0.50 mM) under Ar in DMA/water (9:1 v/v) using 0.10 M  $n\text{Bu}_4\text{NClO}_4$  as the supporting electrolyte and Ag/AgNO<sub>3</sub> ( $1.0 \times 10^{-2}$  M, in CH<sub>3</sub>CN) as the reference electrode. Scan rate: 100 mV/s. (b) Differential pulse voltammogram (DPV) of  $[\text{Ru}(\text{4dmbpy})_3](\text{PF}_6)_2$  (0.50 mM) in the Ar-saturated DMA/water (9:1 v/v) solution.

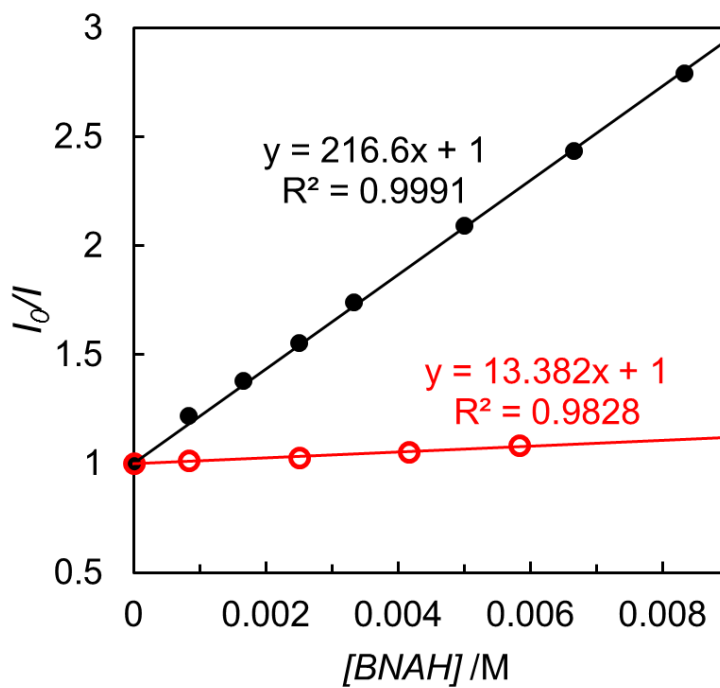

**Figure. S5.** Stern-Volmer plots for emission quenchings of the excited (black)  $[\text{Ru}(\text{bpy})_3]^{2+}$  and (red)  $[\text{Ru}(4\text{dmbpy})_3]^{2+}$  by BNAH in DMA/water (9:1 v/v). See the reference: Y. Kuramochi, M. Kamiya, H. Ishida, *Inorg. Chem.* 2014, **53**, 3326-3332.

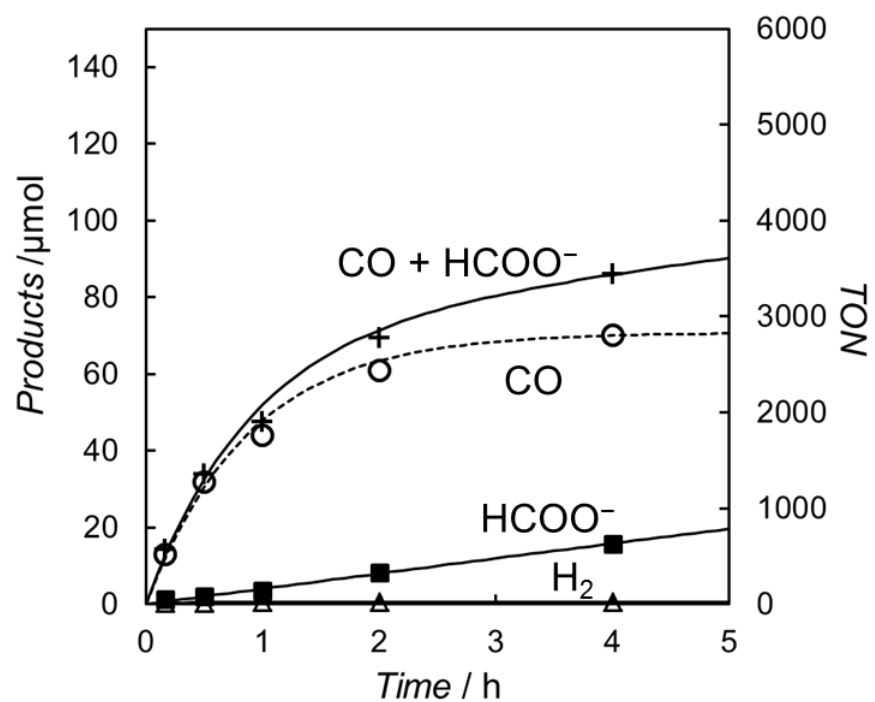

**Figure S6.** Photo-irradiation time dependence of the products in the CO<sub>2</sub>-saturated DMA/water (9:1 v/v) solution containing *trans*(Cl)-Ru(bpy)(CO)<sub>2</sub>Cl<sub>2</sub> (5.0 μM), [Ru(4dmbpy)<sub>3</sub>](PF<sub>6</sub>)<sub>2</sub> (0.50 mM) and BNAH (0.10 M): CO (○), HCOO<sup>-</sup> (■), H<sub>2</sub> (Δ) and CO + HCOO<sup>-</sup> (+).

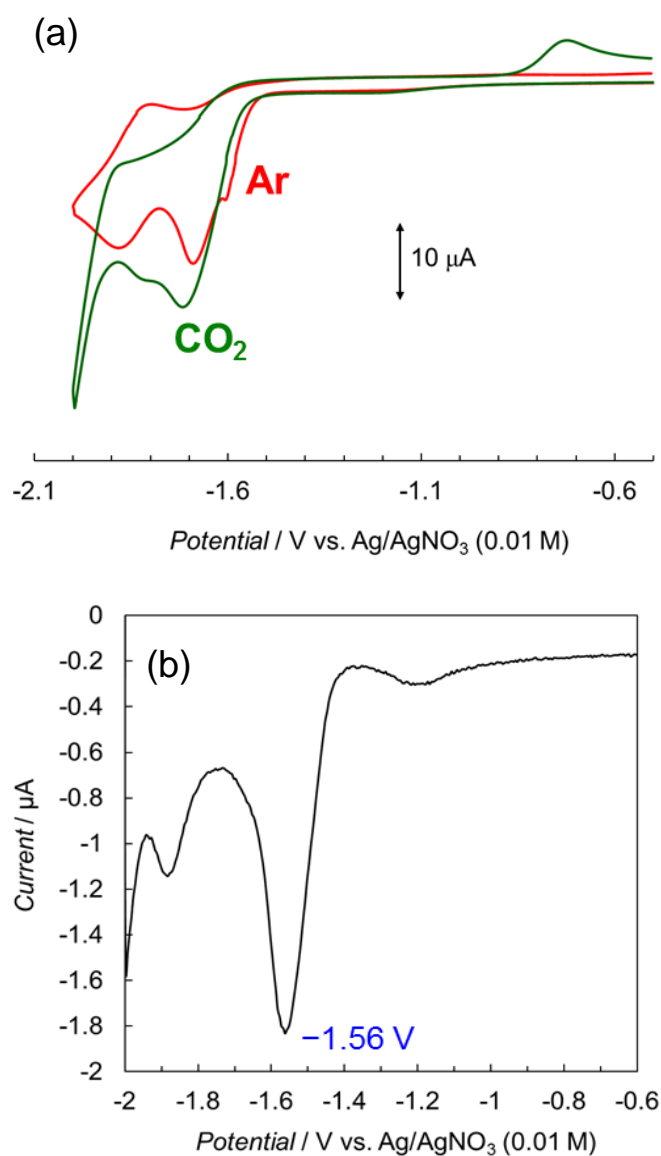

**Figure. S7.** (a) Cyclic voltammograms (CVs) of *trans*(Cl)-Ru(6Mes-bpy)(CO)<sub>2</sub>Cl<sub>2</sub> (1.0 mM) under Ar (red) and CO<sub>2</sub> (green) in DMA/water (9:1 v/v) using 0.10 M *n*Bu<sub>4</sub>NClO<sub>4</sub> as the supporting electrolyte and Ag/AgNO<sub>3</sub> (1.0 × 10<sup>-2</sup> M, in CH<sub>3</sub>CN) as the reference electrode. Scan rate: 100 mV/s. (b) Differential pulse voltammogram (DPV) of *trans*(Cl)-Ru(6Mes-bpy)(CO)<sub>2</sub>-Cl<sub>2</sub> (1.0 mM) in the Ar-saturated DMA/water (9:1 v/v) solution.



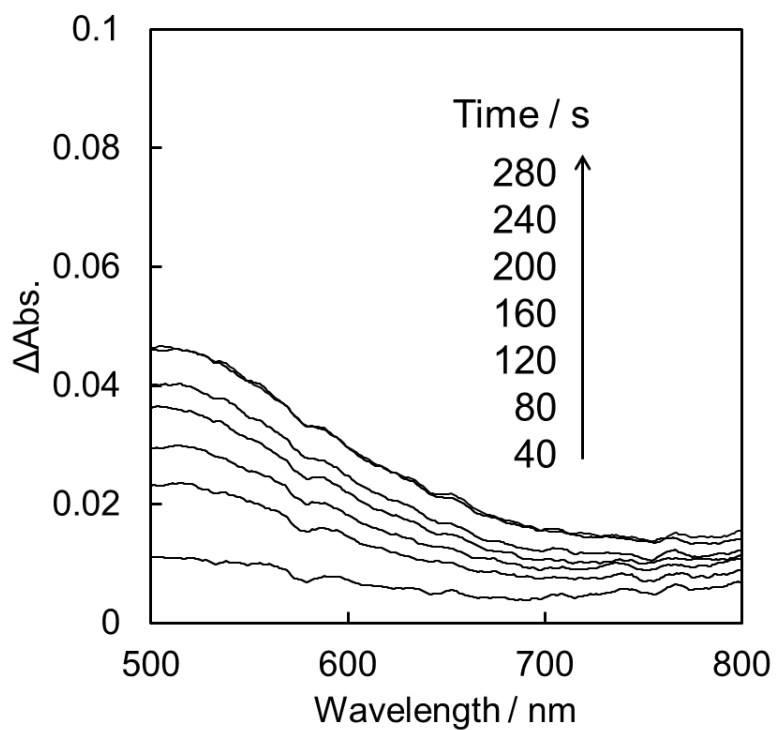

**Figure S8.** Absorption spectral changes of the Ar-saturated DMA solution of *trans*(Cl)-Ru(6Mes-bpy)(CO)<sub>2</sub>Cl<sub>2</sub> (1.0 mM) and <sup>t</sup>Bu<sub>4</sub>NClO<sub>4</sub> (0.10 M) under the controlled potential electrolysis at -1.70 V vs. Ag/Ag<sup>+</sup> (optical path length: 1 mm); the absorption raised at longer wavelengths might be due to bubbles formed during the electrolysis.

## Kinetic Analyses

From Scheme 3 in the main text, the steady state approximation affords the PS and PS\* concentrations as expressed as equations (S1) and (S2), respectively.

$$\frac{d[\text{PS}]}{dt} = -I_{ex} + k_{r+nr}[\text{PS}^*] + \beta k_q [\text{BNAH}][\text{PS}^*] + k_b[\text{PS}^-] + (\sum_i k_i [\text{cat}_i])[\text{PS}^-] = 0 \quad (\text{S1})$$

$$\frac{d[\text{PS}^*]}{dt} = I_{ex} - k_{r+nr}[\text{PS}^*] - (\alpha + \beta)k_q [\text{BNAH}][\text{PS}^*] = 0 \quad (\text{S2})$$

Combining equations (S1) and (S2):

$$k_b[\text{PS}^-] + (\sum_i k_i [\text{cat}_i])[\text{PS}^-] - \alpha k_q [\text{BNAH}][\text{PS}^*] = 0$$

$$[\text{PS}^-] = \frac{\alpha k_q [\text{BNAH}]}{\{k_b + (\sum_i k_i [\text{cat}_i])\}} [\text{PS}^*] \quad (\text{S3})$$

From equation (S2):

$$[\text{PS}^*] = \frac{I_{ex}}{k_{r+nr} + k_q [\text{BNAH}]} \quad (\text{S4})$$

Combining equations (S3) and (S4):

$$[\text{PS}^-] = \frac{\alpha k_q [\text{BNAH}] I_{ex}}{k_b(k_{r+nr} + k_q [\text{BNAH}]) + \sum_i k_i [\text{cat}_i](k_{r+nr} + k_q [\text{BNAH}])} \quad (\text{S5})$$

$$= \frac{(\alpha k_q [\text{BNAH}] I_{ex}) / \{k_b(k_{r+nr} + k_q [\text{BNAH}])\}}{1 + \sum_i k_i [\text{cat}_i] / k_b} \quad (2)$$

According to Scheme 4 in the main text, contribution of the electron transfer from  $[\text{Ru}(\text{bpy})_3]^+$  to the catalyst in equation (2) is expressed as equation (S6) using the steady state approximation:

$$\begin{aligned}
 \sum_i k_i [\text{cat}_i] &= k_1 [\text{Ru-CO}^{2+}] + k_2 [\text{Ru}^+] + k_3 [\text{Ru}^+ - \text{Ru}^+] + k_4 [\text{Ru}^+ - \text{Ru-OCOH}^+] \\
 &= k_1 \frac{k_2}{k_1} [\text{Ru}^+] + k_2 [\text{Ru}^+] + k_3 \frac{k_d [\text{Ru}^+]^2}{k_{-d} + k_3 [\text{PS}^-]} + k_4 \frac{k_3 k_d [\text{Ru}^+]^2}{k_4 (k_{-d} + k_3 [\text{PS}^-])} \\
 &= 2 k_2 [\text{Ru}^+] + \frac{2 k_3 k_d [\text{Ru}^+]^2}{k_{-d} + k_3 [\text{PS}^-]} \quad (\text{S6})
 \end{aligned}$$

Combining equations (2) and (S6):

$$[\text{PS}^-] = \frac{(\alpha k_q [\text{BNAH}] I_{ex}) / (k_r + nr + k_q [\text{BNAH}]) (k_{-d} + k_3 [\text{PS}^-])}{(k_b + 2 k_2 [\text{Ru}^+]) (k_{-d} + k_3 [\text{PS}^-]) + 2 k_d [\text{Ru}^+]^2 k_3} \quad (\text{S7})$$

Since  $[\text{PS}^-] \ll 1 \text{ M}$ , equation (S7) would become:

$$[\text{PS}^-] = \frac{\frac{k_{-d} \alpha k_q [\text{BNAH}] I_{ex}}{k_r + nr + k_q [\text{BNAH}]}}{2 k_d k_3 [\text{Ru}^+]^2 + 2 k_{-d} k_2 [\text{Ru}^+] + k_b k_{-d} + \frac{k_3 \alpha k_q [\text{BNAH}] I_{ex}}{k_r + nr + k_q [\text{BNAH}]}} \quad (\text{S8})$$

The initial rate for CO production is:

$$\frac{d[\text{CO}]}{dt} = k_1 [\text{Ru-CO}^{2+}] [\text{PS}^-] = k_2 [\text{Ru}^+] [\text{PS}^-] \quad (\text{S9})$$

Combining equations (S8) and (S9):

$$\frac{d[\text{CO}]}{dt} = \frac{k_2 \frac{k_{-d} \alpha k_q [\text{BNAH}] I_{ex}}{k_r + nr + k_q [\text{BNAH}]} [\text{Ru}^+]}{2 k_d k_3 [\text{Ru}^+]^2 + 2 k_{-d} k_2 [\text{Ru}^+] + k_b k_{-d} + \frac{k_3 \alpha k_q [\text{BNAH}] I_{ex}}{k_r + nr + k_q [\text{BNAH}]}} \quad (\text{S10})$$

When  $[\mathbf{Ru}^+] \ll 1 \text{ M}$ ,  $[\mathbf{Ru}^+] = \gamma [\text{cat}]_t$ , where  $[\text{cat}]_t$  is the initial concentration of *trans*(Cl)-Ru(bpy)(CO)<sub>2</sub>Cl<sub>2</sub>,  $\gamma$  is a proportional constant peculiar to the catalyst. The value of  $\gamma$  would be related to  $k_{\text{CO}_2}$  and  $k_{\text{CO}_2}'$ , and a larger  $\gamma$  is expected to indicate higher reaction rate of the reduced catalyst with CO<sub>2</sub> and H<sup>+</sup>. Equation (S10) can be written:

$$\frac{d[\text{CO}]}{dt} = \frac{a[\text{cat}]_t}{b[\text{cat}]_t^2 + c[\text{cat}]_t + d} = \frac{(a/d)[\text{cat}]_t}{(b/d)[\text{cat}]_t^2 + (c/d)[\text{cat}]_t + 1} \quad (\text{S11})$$

where  $a$ ,  $b$ ,  $c$  and  $d$  are expressed as the following:

$$a = k_2 \frac{k_{-d} \alpha k_q [\text{BNAH}] I_{\text{ex}}}{k_{r+nr} + k_q [\text{BNAH}]} \gamma \quad (\text{S12})$$

$$b = 2k_d k_3 \gamma^2 \quad (\text{S13})$$

$$c = 2k_{-d} k_2 \gamma \quad (\text{S14})$$

$$d = k_b k_{-d} + \frac{k_3 \alpha k_q [\text{BNAH}] I_{\text{ex}}}{k_{r+nr} + k_q [\text{BNAH}]} \quad (\text{S15})$$

Considering the blank products caused by [Ru(bpy)<sub>3</sub>](PF<sub>6</sub>)<sub>2</sub>, equation (S11) becomes equation (3) in the main text.  $v_0$  is the blank formation rate of CO.

$$v_{\text{CO}}(\text{M/s}) = v_0(\text{M/s}) + \frac{a [\text{cat}]_t (\text{M})}{b [\text{cat}]_t^2 (\text{M}^2) + c [\text{cat}]_t (\text{M}) + d} \quad (3)$$

Curve fitting on the experimental result in Figure 3 gives a following equation with specific values of  $a$ ,  $b$ ,  $c$  and  $d$  (see Figure S9).

$$v_{\text{CO}}(\text{M/s}) = 1.2 \times 10^{-6} + \frac{1.1[\text{cat}]_t (\text{M})}{1.1 \times 10^9 [\text{cat}]_t^2 (\text{M}^2) + 9.1 \times 10^4 [\text{cat}]_t (\text{M}) + 1} \quad (\text{S16})$$

where concentration of CO is calculated by dividing mol of CO with volume of the reaction solution (5.0 mL).

The initial rate for formate production is:

$$\begin{aligned}\frac{d[\text{HCOO}^-]}{dt} &= k_4[\text{Ru}^+ - \text{Ru-OCOH}^+][\text{PS}^-] = k_3 \frac{k_d[\text{Ru}^+]^2}{k_{-d} + k_3[\text{PS}^-]}[\text{PS}^-] \\ &= k_3 \frac{k_d[\text{Ru}^+]^2}{k_{-d}/[\text{PS}^-] + k_3}\end{aligned}\quad (\text{S17})$$

Combining equations (S8) and (S17):

$$\frac{d[\text{HCOO}^-]}{dt} = \frac{k_3 k_d \frac{\alpha k_q [\text{BNAH}] I_{ex}}{k_r + nr + k_q [\text{BNAH}]} [\text{Ru}^+]^2}{2k_d k_3 [\text{Ru}^+]^2 + 2k_{-d} k_2 [\text{Ru}^+] + k_b k_{-d}} \quad (\text{S18})$$

When  $[\text{Ru}^+] = \gamma [\text{cat}]_t$ , equation (S18) can be written:

$$\frac{d[\text{HCOO}^-]}{dt} = \frac{a' [\text{cat}]_t^2}{b' [\text{cat}]_t^2 + c' [\text{cat}]_t + d'} \quad (\text{S19})$$

where  $a'$ ,  $b'$ ,  $c'$  and  $d'$  are expressed as the following:

$$a' = k_3 k_d \frac{\alpha k_q [\text{BNAH}] I_{ex}}{k_r + nr + k_q [\text{BNAH}]} \gamma^2 \quad (\text{S20})$$

$$b' = 2k_d k_3 \gamma^2 \quad (\text{S21})$$

$$c' = 2k_{-d} k_2 \gamma \quad (\text{S22})$$

$$d' = k_b k_{-d} \quad (\text{S23})$$

Considering the blank products caused by  $[\text{Ru}(\text{bpy})_3](\text{PF}_6)_2$ , equation (S19) becomes equation (4) in the main text.  $v_0'$  is the blank formation rate of formate.

$$v_{\text{HCOO}^-}(\text{M/s}) = v_0'(\text{M/s}) + \frac{a' [\text{cat}]_t^2 (\text{M})}{b' [\text{cat}]_t^2 (\text{M}^2) + c' [\text{cat}]_t (\text{M}) + d'} \quad (4)$$

Concentration of formate is calculated by dividing mol of formate with volume of the reaction solution (5.0 mL). The fitting analyses show that  $a'$ ,  $b'$  and  $c'$  have specific values while the simulation curve is less dependent on the value of  $d'$  (see Figure S10). When the term of  $d'$  is negligible, equation (4) becomes:

$$v_{HCOO^-}(\text{M/s}) = v'_0 (\text{M/s}) + \frac{a' [\text{cat}]_t(\text{M})}{b' [\text{cat}]_t(\text{M}) + c'} \quad (5)$$

Double-reciprocal form becomes:

$$(v_{HCOO^-} - v'_0)^{-1} = \frac{c'}{a'} \frac{1}{[\text{cat}]_t} + \frac{b'}{a'} \quad (\text{S24})$$

Double-reciprocal plots give a following equation.

$$v_{HCOO^-}(\text{M/s}) = 4.2 \times 10^{-7} + \frac{0.10[\text{cat}]_t (\text{M})}{1.8 \times 10^4 [\text{cat}]_t (\text{M}) + 1} \quad (\text{S25})$$

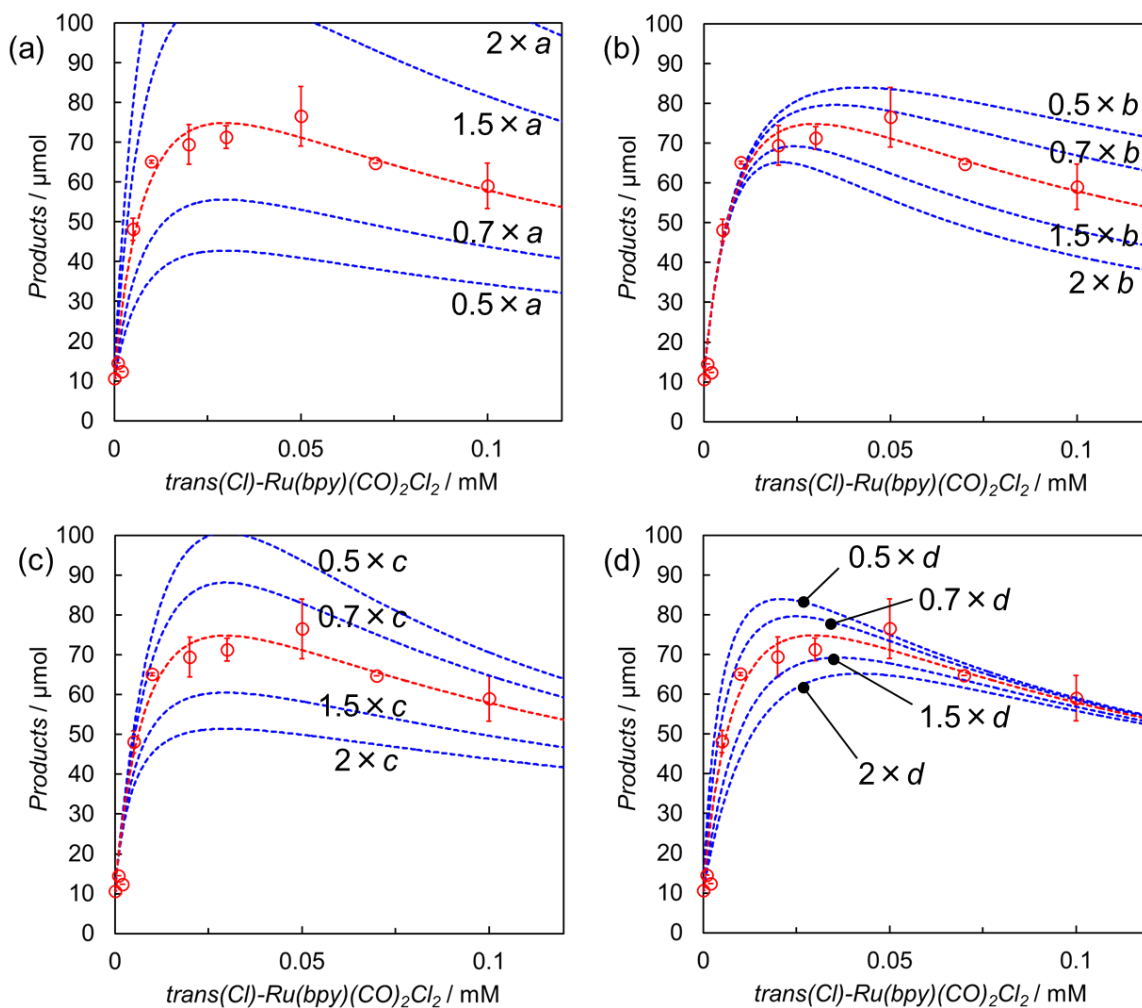

**Figure S9.** Simulation curves by changing the parameters of (a)  $a$ , (b)  $b$ , (c)  $c$  and (d)  $d$  in equation (3). The red lines show the simulation curves using  $a = 1.1$ ,  $b = 1.1 \times 10^9$ ,  $c = 9.1 \times 10^4$  and  $d = 1.0$ .

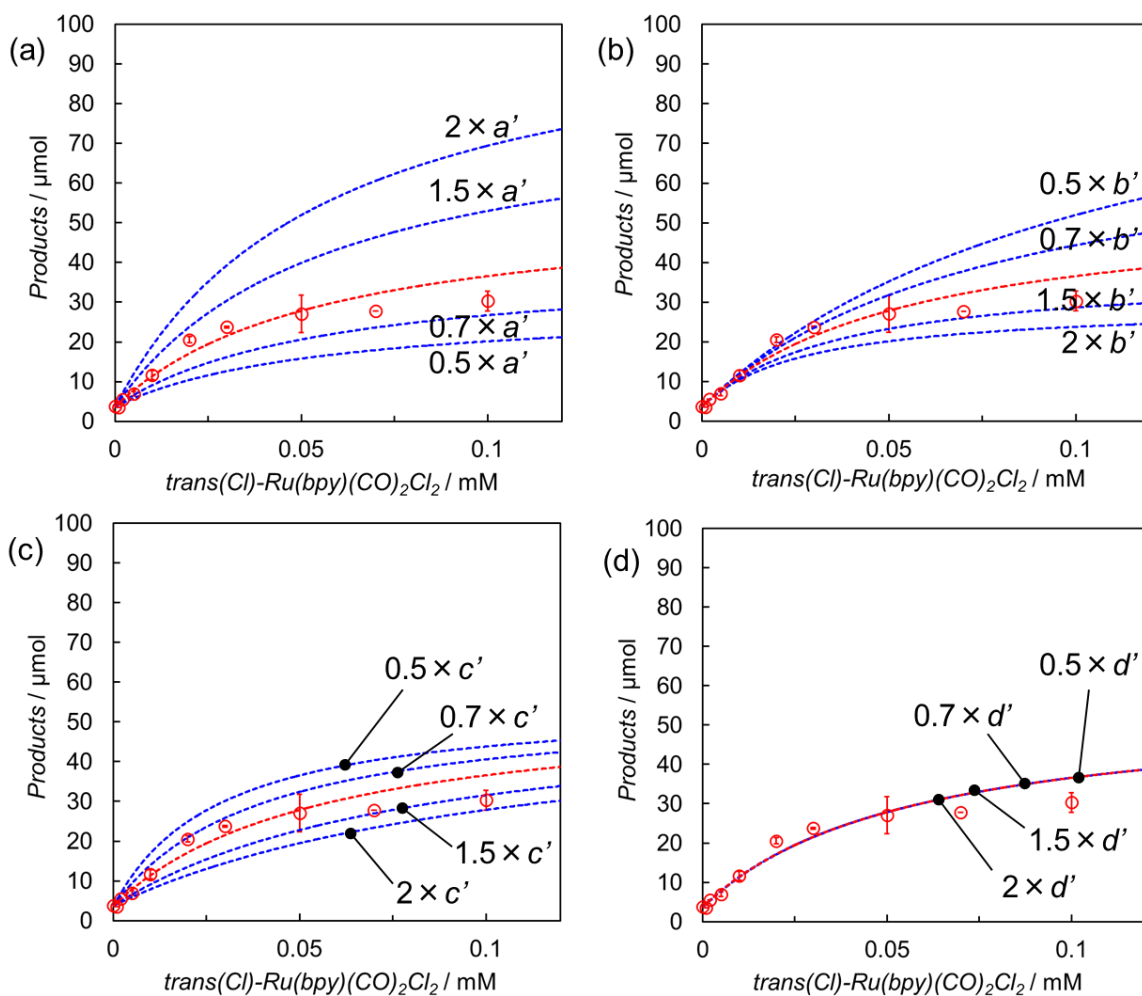

**Figure S10.** Simulation curves by changing the parameters of (a)  $a'$ , (b)  $b'$ , (c)  $c'$  and (d)  $d'$  in equation (4). The red lines show the simulation curves using  $a' = 1.0 \times 10^6$ ,  $b' = 1.8 \times 10^{11}$ ,  $c' = 1.0 \times 10^7$  and  $d' = 1.0$ .



### Kinetic Analyses without Forming the Dimer

When the dimer formation is negligible in Scheme 4, equation (S6) becomes:

$$\sum_i k_i [\text{cat}_i] = k_1 [\text{Ru-CO}^{2+}] + k_2 [\text{Ru}^+] = 2 k_2 [\text{Ru}^+] \quad (\text{S26})$$

Combining equations (2) and (S26):

$$[\text{PS}^-] = \frac{\alpha k_q [\text{BNAH}] I_{ex}}{2k_2(k_{r+nr}+k_q [\text{BNAH}])[\text{Ru}^+] + k_b(k_{r+nr}+k_q [\text{BNAH}])} \quad (\text{S27})$$

Combining equations (S9) and (S27) and considering the blank product:

$$v_{CO}(\text{M/s}) = v_0(\text{M/s}) + \frac{a'' [\text{cat}]_t}{b'' [\text{cat}]_t + c''} \quad (7)$$

where  $a''$ ,  $b''$  and  $c''$  are expressed as the following:

$$a'' = k_2 \alpha k_q [\text{BNAH}] I_{ex} \gamma \quad (\text{S28})$$

$$b'' = 2k_2(k_{r+nr} + k_q [\text{BNAH}]) \gamma \quad (\text{S29})$$

$$c'' = k_b(k_{r+nr} + k_q [\text{BNAH}]) \quad (\text{S30})$$
